# Supplementary material
Source: bioRxiv or medRxiv preprint supplement (http://medrxiv.stage.highwire.org/highwire/filestream/95360/field_highwire_adjunct_files/0/2020.09.01.20184937-1.pdf)
Supplement: Supplementary file [file 2020.09.01.20184937-1.pdf]

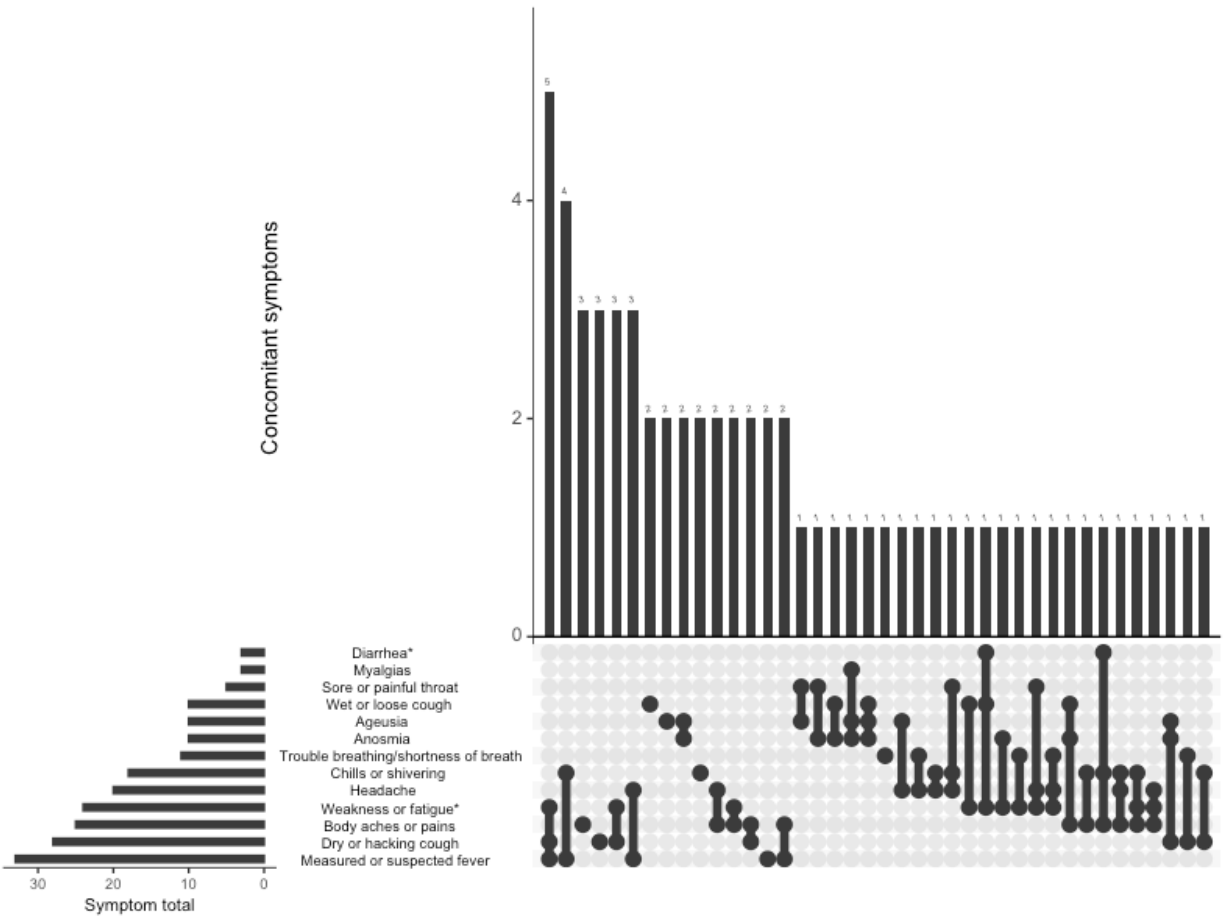

**Appendix Figure S1.** (A) Upset plot of first symptoms recalled noted during COVID-19 infection at enrollment.

\*All symptoms except those with asterisks are in the current interim April 2020 CDC COVID-19 CDC definition.

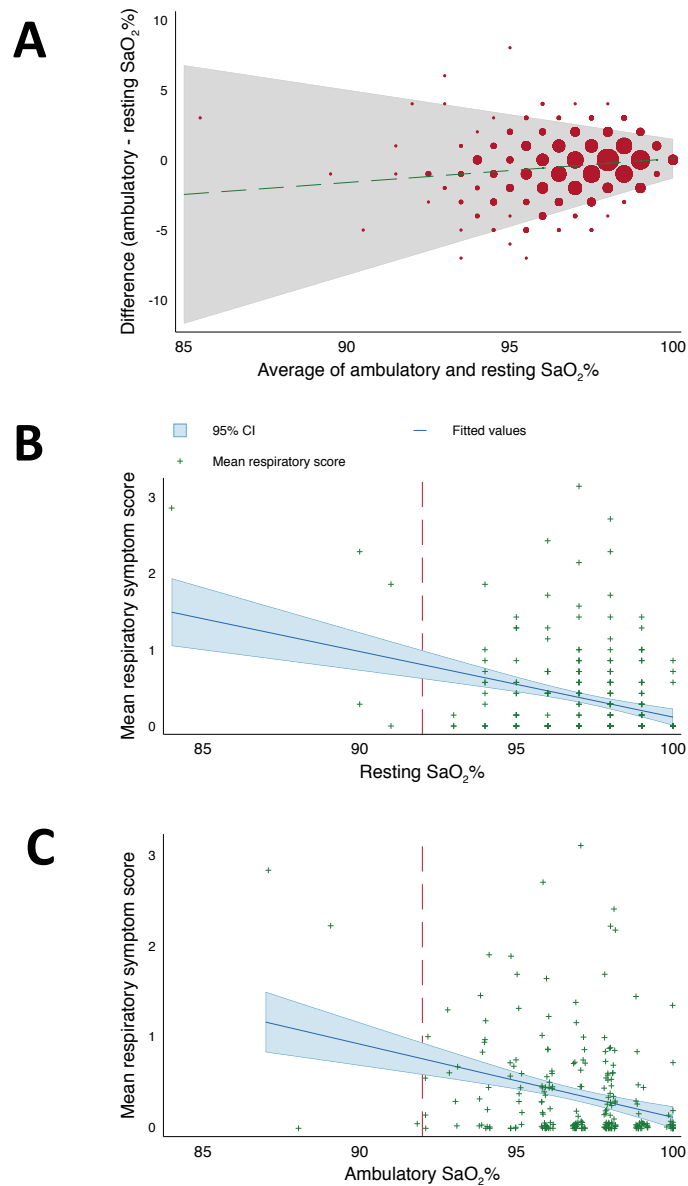

**Appendix Figure S2.** Scatter plots with linear fitted line and confidence interval for (A) resting oxygen saturation (%) and (B) ambulatory oxygen saturation (%) with the lower threshold of normal indicated by the red dashed line (92%). (C) Bland-Altman plot demonstrates that the difference between oxygen saturations at rest and during walking widens as the oxygenation decreases.



**Appendix Table S2.** Clinical characteristics of individuals that were subsequently hospitalized

| Age and sex     | Comorbidities                                                                | Last SaO <sub>2</sub><br>Resting/<br>Ambulatory prior<br>to ED (%) | Reason for ED<br>Referral (by<br>whom)            | Inflammatory<br>markers                                           | Admission Length/<br>outcome                                                            | Pulse oximetry<br>Informed ED<br>Referral? |
|-----------------|------------------------------------------------------------------------------|--------------------------------------------------------------------|---------------------------------------------------|-------------------------------------------------------------------|-----------------------------------------------------------------------------------------|--------------------------------------------|
| 69 yo male      | DVT, Hypertension,<br>Pulmonary Embolism,<br>Colon Polyp, G6PD<br>Deficiency | 96 / 92                                                            | Dyspnea (PCP)                                     | CRP 22.9 peak, IL-<br>6 73.6                                      | 7 day admission<br>(hydroxychloroquine<br>azithromycin<br>randomized clinical<br>trial) | No                                         |
| 54 yo male      | Hypertension                                                                 | 95 / 96                                                            | Chest pain (Pt)                                   | WBC 12.6K,<br>ferritin 164, LDH<br>256, D-dimer<br><0.19          | 3 day admission                                                                         | No                                         |
| 69 yo male      | Former smoker, Asthma,<br>COPD                                               | 84 / -                                                             | Dyspnea<br>(Team)                                 | WBC 5.7K, ferritin<br>751, LDH 272                                | Hospitalized <sup>2</sup><br>(randomized clinical<br>study)                             | Yes                                        |
| 66 yo<br>female | Former smoker,<br>Hypertension,<br>Hyperlipidemia, Asthma,<br>Neuropathy     | 91 / 84 (in the<br>ED)                                             | Dyspnea<br>(Team)                                 | WBC 3.8K, CRP<br>11.7, ferritin 411,<br>LDH 256                   | 17 day admission (>4L<br>O <sub>2</sub> , remdesivir)                                   | No                                         |
| 48 yo<br>female | Pneumonia, Pre-diabetic                                                      | 89 / -                                                             | Cough, fever,<br>body aches,<br>dyspnea<br>(Team) | WBC 9.2K, ferritin<br>668, LDH 339, D-<br>dimer 0.51, IL-6<br>7.1 | 7 day admission (4L O <sub>2</sub> ,<br>remdesivir)                                     | Yes                                        |

|              |                                                                                                                                         |             |                                |                                                        |                                                                                            |     |
|--------------|-----------------------------------------------------------------------------------------------------------------------------------------|-------------|--------------------------------|--------------------------------------------------------|--------------------------------------------------------------------------------------------|-----|
| 63 yo female | Former smoker, CA Disease, Hypertension, Hyperlipidemia, Valvular Heart Disease, Diabetes, Hypothyroid                                  | 93; 82 / 88 | Cough, dyspnea (Pt)            | WBC 4K, d-dimer 0.74, CRP 26.8, Ferritin 1539, LDH 330 | 12 day admission (intubated, dexamethasone)                                                | No  |
| 69 yo male   | CA Disease, Hypertension, MI, Stroke, Carotid Artery Disease, Chronic Sinusitis, Barrett's Esophagus, Esophagitis, Diabetes, Depression | 95 / 95     | Diarrhea, (Pt, PCP)            | WBC 3.7K, CRP 1.2 mg/dL                                | 3 day admission                                                                            | No  |
| 65 yo female | Hypertension, GERD                                                                                                                      | 85 / -      | Dyspnea, fever (Pt)            | WBC 4.39K, d-dimer 0.8, CRP 9.4, Ferritin 847, LDH 307 | 5 day admission (5L O2, remdesivir, dexamethasone); convalescent plasma prior to admission | No  |
| 54 yo female | Pneumonia due to COVID-19, Hypoxia, Morbid Obesity                                                                                      | 92 / 80     | Dyspnea, fatigue, fever (Team) | WBC 6.7K, d-dimer 0.69                                 | 5 day admission (2L O2, remdesivir, dexamethasone)                                         | Yes |

---

ED: emergency department, Pt: patient; WBC: white blood count; yo: years of age

**Appendix Table S3.** Performance characteristics of lowest resting oxygen saturation within the first week of symptoms (N=42) for predicting subsequent hospitalization.

| SaO <sub>2</sub> Cut Point (%) | Sensitivity (%) | Specificity (%) | Correctly Classified (%) | LR+ | LR- |
|--------------------------------|-----------------|-----------------|--------------------------|-----|-----|
| ≤ 100                          | 100             | 0.0             | 9.5                      | 1.0 |     |
| ≤ 98                           | 100             | 2.6             | 11.9                     | 1.0 | 0.0 |
| ≤ 97                           | 100             | 10.5            | 19.1                     | 1.1 | 0.0 |
| ≤ 96                           | 100             | 34.2            | 40.5                     | 1.5 | 0.0 |
| ≤ 95                           | 100             | 65.8            | 69.1                     | 2.9 | 0.0 |
| ≤ 94                           | 50              | 76.3            | 73.8                     | 2.1 | 0.7 |
| ≤ 93                           | 50              | 92.1            | 88.1                     | 6.3 | 0.5 |
| ≤ 91                           | 25              | 97.4            | 90.5                     | 9.5 | 0.8 |
| ≤ 85                           | 25              | 100.0           | 92.9                     |     | 0.8 |

LR+: Positive likelihood ratio

LR-: Negative likelihood ratio

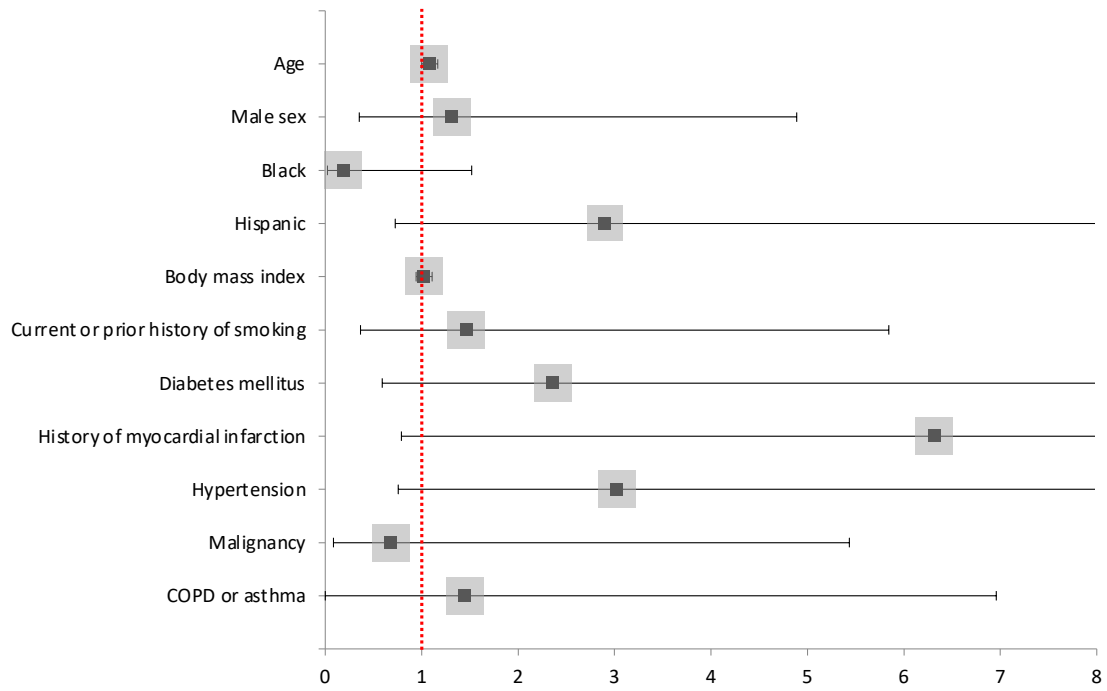

**Appendix Figure S3.** Incidence rate ratios of subsequent hospitalization by baseline demographics and comorbid conditions.
